# Supplementary material for: Global long-term hourly 9 km terrestrial water-energy-carbon fluxes (FluxHourly)
Source: Copernicus journal article supplement (doi:10.5194/essd-2025-183), 2025-04-29
Supplement: Supplementary file [file essd-2025-183-AC1-supplement.pdf]

We sincerely thank the Editor, Associate Editor and Reviewers for handling and taking the time to read and review our manuscript. We greatly appreciate the reviewer's insightful and constructive remarks. They have helped us improve both the scientific rigor and the readability of the manuscript. Below we address each comment in turn. Line numbers refer to the clean revised version unless otherwise indicated.

The diurnal cycles of terrestrial ecosystem gas exchanges determine the land-atmosphere interaction and land ecosystem function feedback to climate change. This study first incorporated 170 flux in-situ observations covering 11 ecosystem types to train and test the canopy irradiative transfer model (SCOPE), Then latent heat flux, sensible heat flux, soil heat flux, GPP and SIF for each flux site generated by the SCOPE model. Finally, random forest model machine learning method integrated with global gridded meteorology and remote sensing was applied to interpolate the site-level variables to global gridded hourly fluxes. This is an interesting study, and fill the scope of ESSD. And are attractive to the community.

However, I have some major concerns for its current version.

**Comment 1:** For the introduction, the author did not refer to the STEMMUS-SCOPE. I guess the authors try to use the SCOPE model to retrieve SIF timeseries for each flux tower? Then I suggest to illustrate the significance of SIF in generating the global hourly gridded fluxes, since the authors have referred SCOPE model in the Abstract.

**Response 1:** We thank the reviewer for pointing out the need for clarification. In the revised introduction (lines 68-74), we have explicitly introduced STEMMUS-SCOPE model and clarified its role in our workflow. In our study, SIF is treated as an output variable rather than an input driver. Specifically, STEMMUS-SCOPE simulates hourly SIF alongside the five other flux variables at 170 PLUMBER2 sites. We then used simulated SIF time series as a target in our random forest upscaling. From this, the RF model generates a global 0.1° hourly SIF product at 685 and 740 nm (along with the other five variables) based on gridded remote-sensing and meteorological predictors.

The significance of SIF is briefly illustrated in lines 39-41, and we have added more sentences to illustrate its significance in lines 41-43. Including SIF explicitly as an output can reflect diurnal and stress-driven photosynthetic dynamics, thereby improving the physiological interpretability of our global hourly flux dataset.

For the result, site-level training and test.

**Comment 2:** 1. The author used site-level GPP and SIF to drive the RF interpolation(RF\_OI)? Please show the accuracy comparison between GPP\_scope and GPP\_EC .

**Response 2:** Thank you for raising this important point. The comparison for GPP\_STEMMUS\_SCOPE and GPP\_EC was already done in our another paper (Wang et al. 2025). <https://www.nature.com/articles/s41597-025-05386-x>

This is the text from the above mentioned paper: “The simulation of GPP is slightly more accurate than that of NEE. For GPP, the KGE ranged from -0.35 to 0.93 with a median value of 0.55 (median R<sup>2</sup>, RMSE, rRMSE, and rSD values are 0.64, 3.79 μmol m<sup>-2</sup> s<sup>-1</sup>, 6.15%, and 0.18, respectively).”

For SIF, we only used output from STEMMUS-SCOPE (due to the lack of in-situ data, but we compared our product with TROPOMISIF in Figure S9).

**Comment 3:** 2. Figure 3 and Figure 4 are good ways to show the technical issue of RF\_OI. But I suggest to add analyze the diurnal variations of GPP/LE/H for each IGBP class directly between the SCOPE output and EC tower. For example the the comparison (SCOPE v.s. EC tower) of mean diurnal cycle within one year for each IGBP class? within one season? This could tell the readers of message from IGBP classes.

**Response 3:** Thanks for pointing this out. We have made a new figure to compare GPP/LE/H for each IGBP class between STEMMUS-SCOPE output and EC tower observations. For each IGBP class, we first check which year most of the stations have data, then this year was chosen to make plot. For each IGBP class, we labelled the year we chose for plotting, and the number of stations in that year, and the total number of stations for each IGBP. This new figure is Figure S13 in Supplementary S5 (Section 5). The old S5 was changed to “S6”.

### Closed shrublands | 2005

Number of stations in 2005=2 / total number of stations in this igbp=2

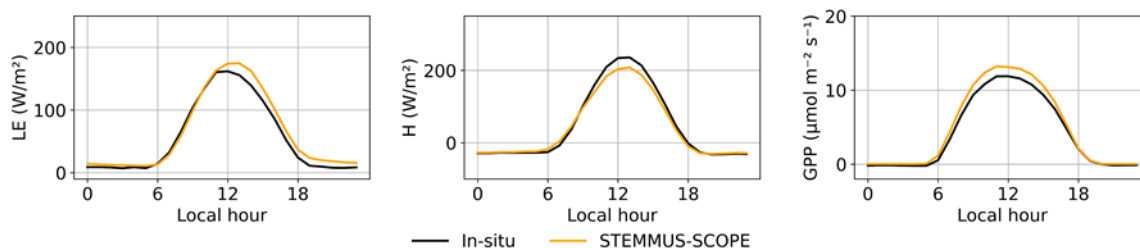

### Croplands | 2005

Number of stations in 2005=14 / total number of stations in this igbp=17

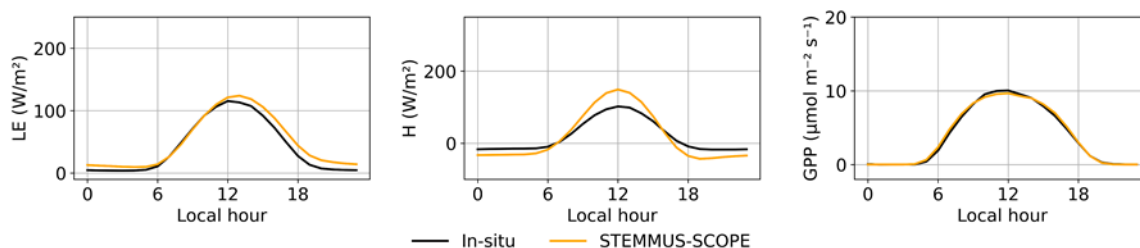

### Deciduous Broadleaf Forests | 2004

Number of stations in 2004=12 / total number of stations in this igbp=20

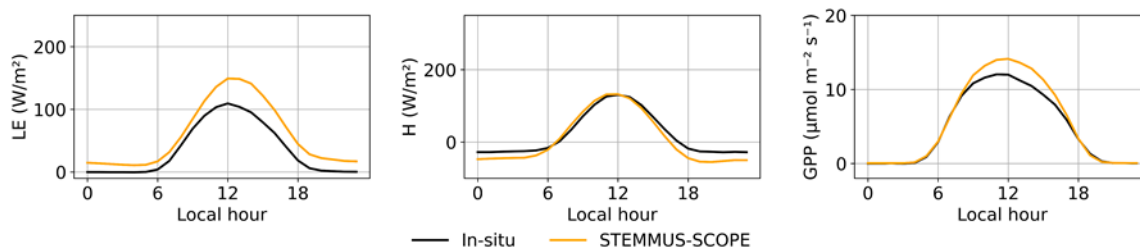

### Evergreen Broadleaf Forest | 2003

Number of stations in 2003=8 / total number of stations in this igbp=16

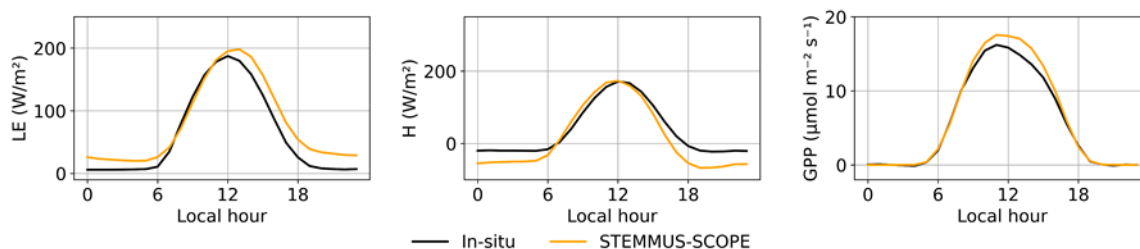

### Evergreen Needleleaf Forests | 2004

Number of stations in 2004=22 / total number of stations in this igbp=36

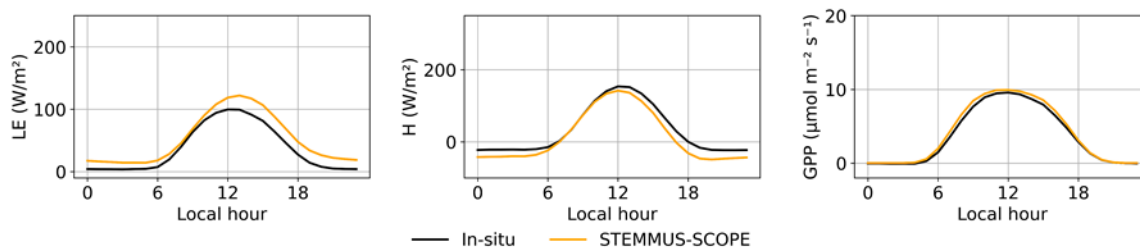

### Grasslands | 2005

Number of stations in 2005=19 / total number of stations in this igbp=40

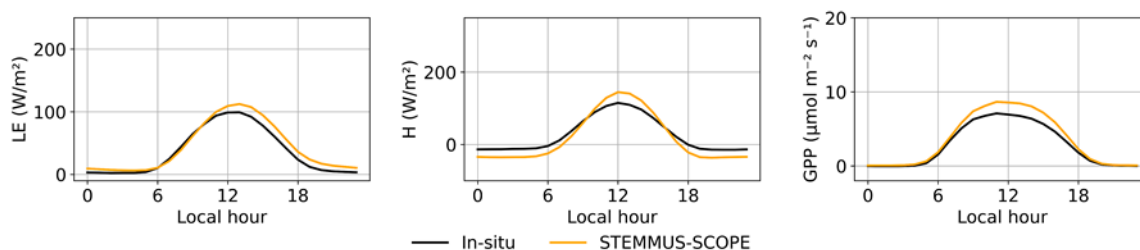

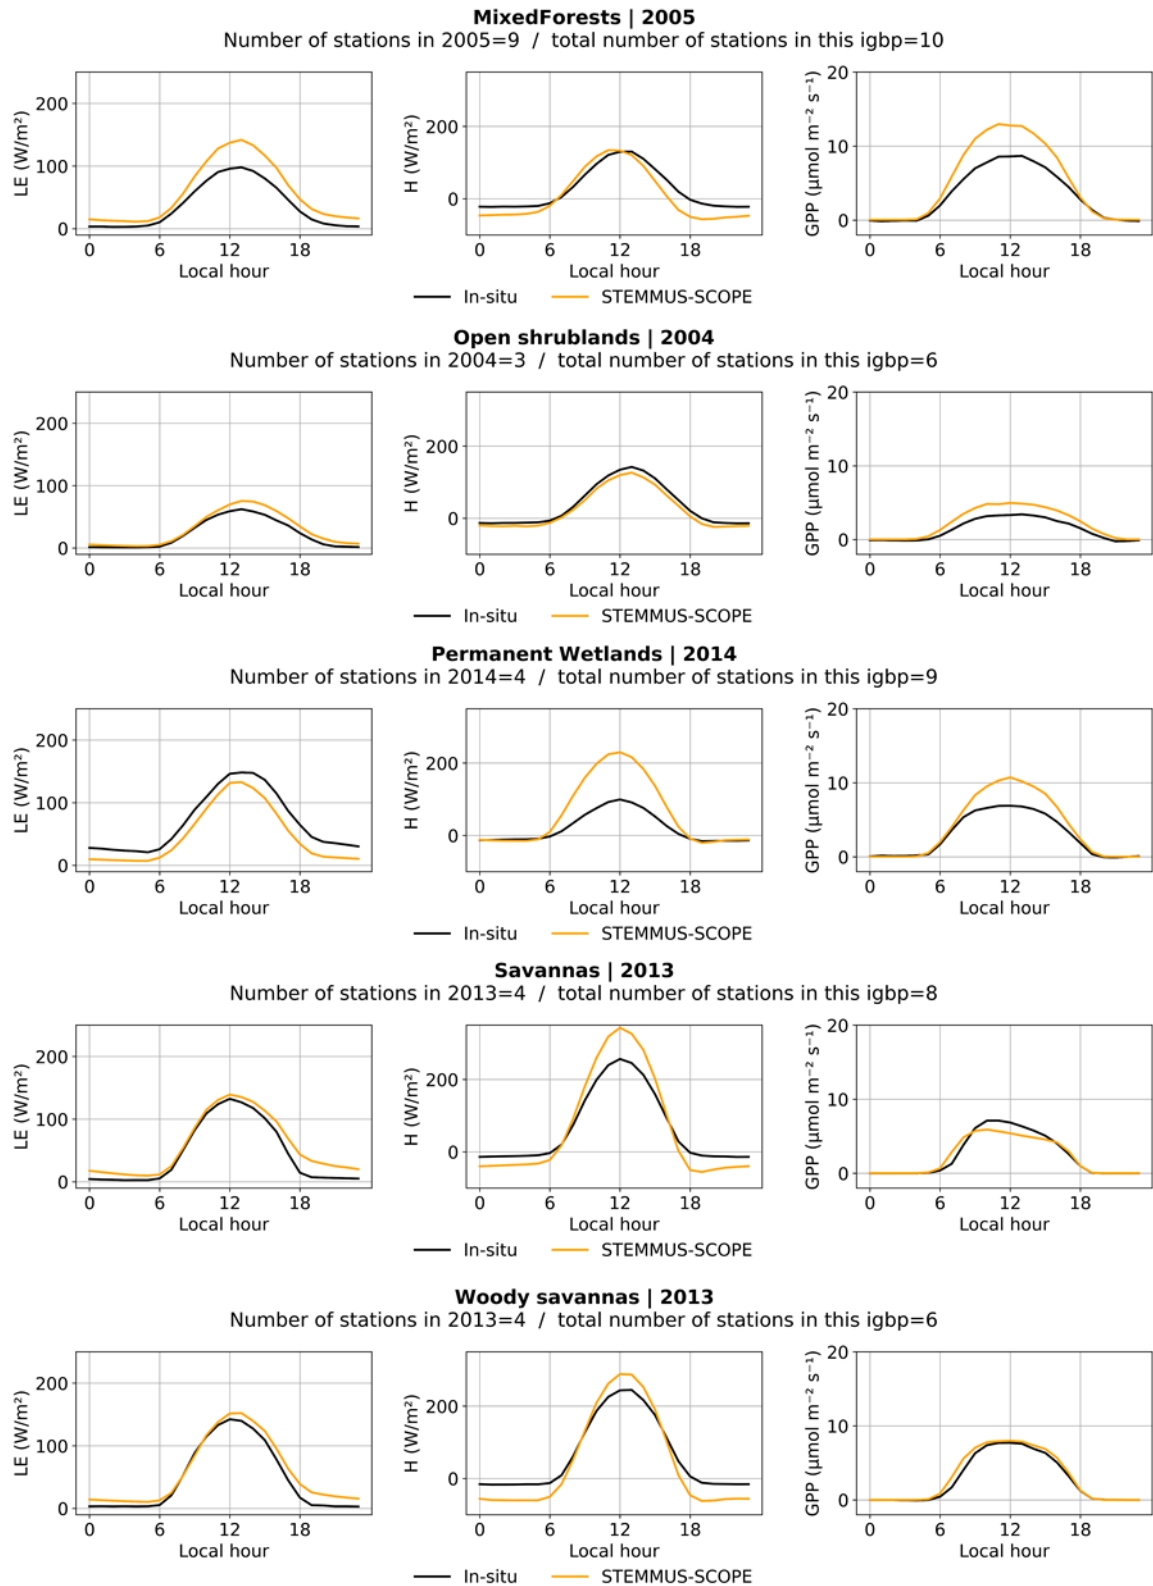

For the global gridded fluxes,

**Comment 4:** 1. If I do not miss the global patterns of hourly products, I did not find the global mean (magnitude) and trends map for each three wate-carbon-energy flux.

Response 4: This is a good point and we agree that the global mean and trends map are important. We have calculated 2001-2020 mean (because 2000 miss data for Jan and Feb, so it is excluded) and trend maps for 2001-2020 annual mean. This new figure is Figure S14 in Supplementary S5 (Section 5).

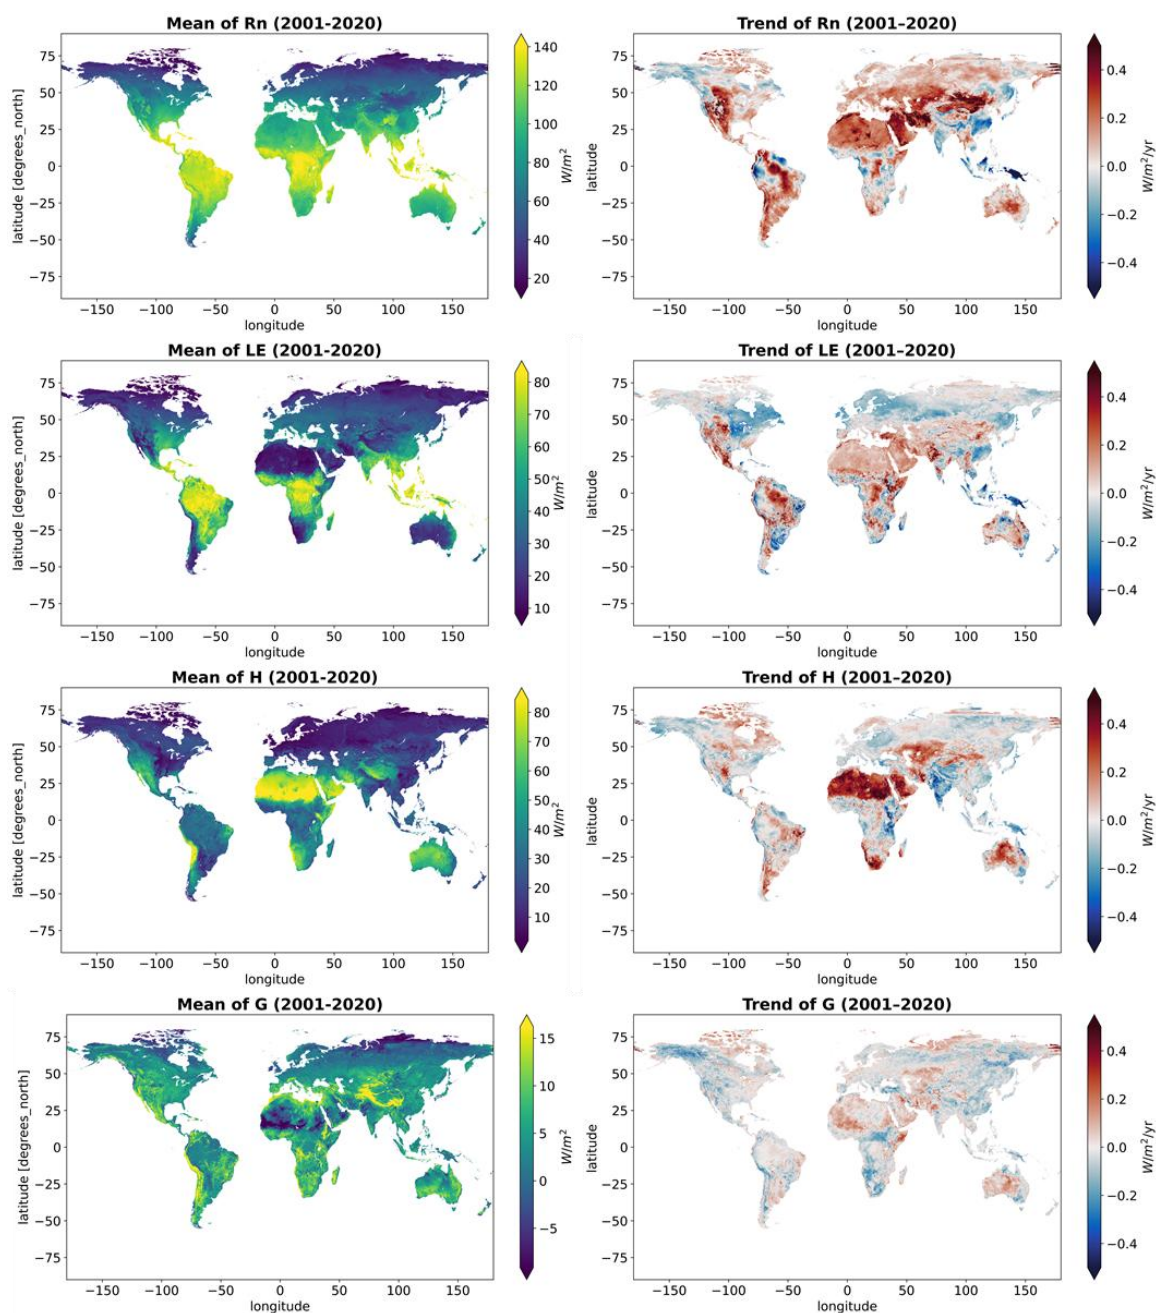



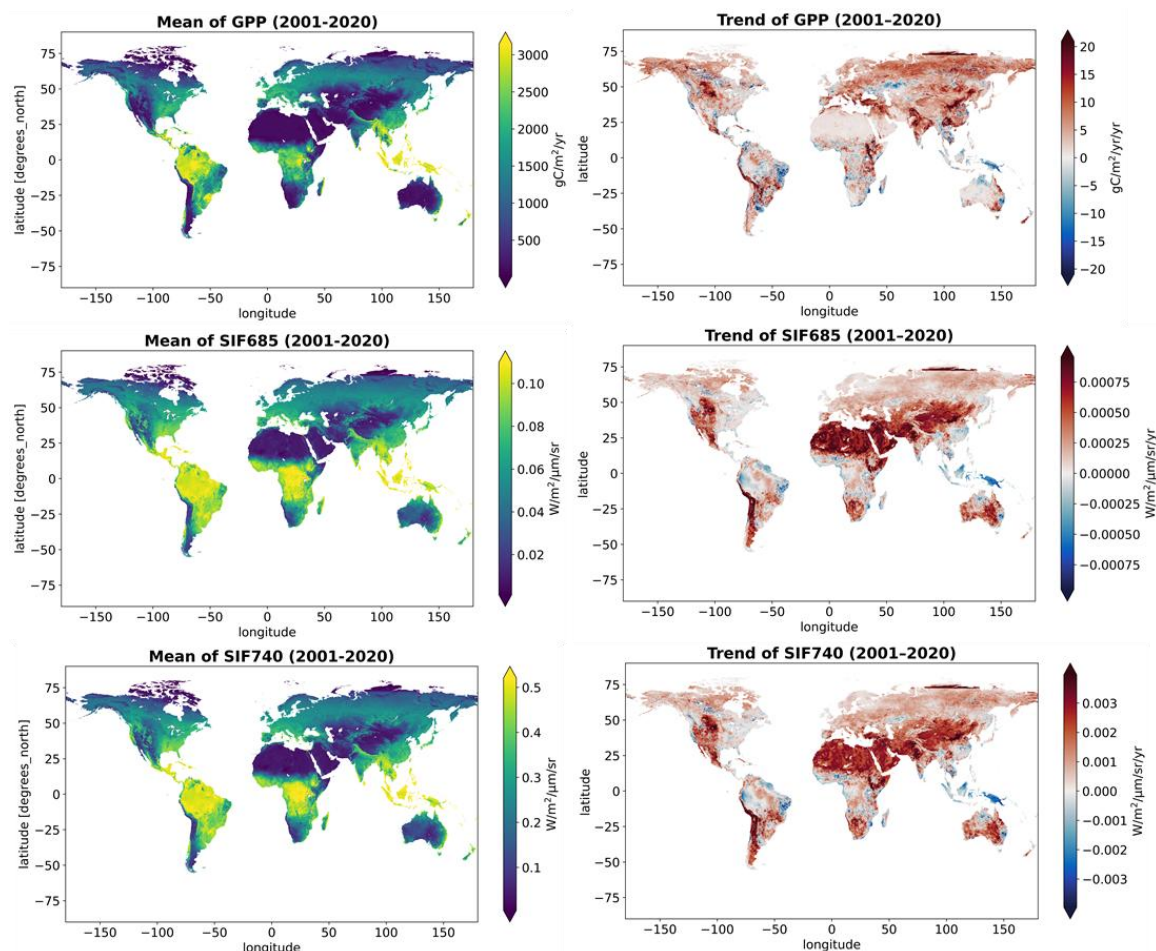

Comment 5: 2. And then inter-comparison of the mapping pattern between RF\_OI and existing hourly products such as FLUXCOM. Currently, the author only show the intercomparison map of LE (Figure 6)?

Response 5: Thanks for noticing this. Figure S9 shows the inter-comparison of  $R_n$ ,  $H$ , GPP and SIF740. In lines 249-276, we described that “Figures 6 and S9 illustrates the spatial distribution of  $R_n$ , LE,  $H$ , GPP and SIF740 across different datasets.” with detailed descriptions.

In line 251, we modified from “Figures 7 and S8” to “Figure 6 and S9”. This was an error.

In line 272, we modified from “Figure S8” to “Figure S9”. This was an error.

Comment 6: 2. Please explain the rational for the selected 8 regions to decompose the global product. Why not select the global plant function type classes or K-G climate classes.

Response 6: Actually the selected 8 regions were based on K-G climate classes, in lines 283-286. These 8 regions cover five main climate zones, and the K-G climate classes each region covers is listed in Table 3.

Comment 7: 3. Also, the author showed the diurnal cycle of global LE and GPP hourly fluxes for the 8 regions, respectively, but we did not find the 8 regions analyze for global hourly fluxes.

Response 7: It is described in lines 289-306, not only hourly LE and GPP, but also  $R_n$ ,  $H$ , and  $G$  which are corresponding to Figures S10-S12.

## Reference

Wang, Y., Zeng, Y., Alidoost, F., Schilperoort, B., Song, Z., Yu, D., Tang, E., Han, Q., Liu, Z., & Peng, X. A physically consistent dataset of water-energy-carbon fluxes across the Soil-Plant-Atmosphere Continuum. *Sci. Data*, 12, 1146, 2025
